# Supplementary material for: Investigate the Processability of Biobased Thermoplastics Used in Nonwoven Fabrics
Source: PubMed Central journal article supplement — ACS Polym Au. 2024 Jun 19;4(5):405–19. doi: 10.1021/acspolymersau.4c00023 (PMC11468515; doi:10.1021/acspolymersau.4c00023), 2024-06-19
Supplement: lg4c00023_si_001.pdf [file lg4c00023_si_001.pdf]

## Supporting information

**Investigate the processability of biobased thermoplastics used in nonwoven fabrics**

**Aravin Prince Periyasamy<sup>1\*</sup>, Enni Luoma<sup>2</sup>, Tim Höhnemann<sup>3</sup>, Simon Ringger<sup>3</sup>, Pirjo Heikkilä<sup>4</sup>**

<sup>1</sup>*Biomaterial processing and products / Textile and Nonwoven materials, VTT Technical Research Centre of Finland Ltd, Tietotie 4E, 02150 Espoo, Finland.*

<sup>2</sup>*Biopolymer and composite solutions, VTT Technical Research Centre of Finland Ltd, Visiokatu 4, 33720 Tampere, Finland.*

<sup>3</sup>*German Institutes for Textile and Fiber Research, Koerschtalstraße 26, 73770 Denkendorf, Germany.*

<sup>4</sup>*Biomaterial processing and products / Textile and nonwoven materials, VTT Technical Research Centre of Finland Ltd, Visiokatu 4, 33720 Tampere, Finland*

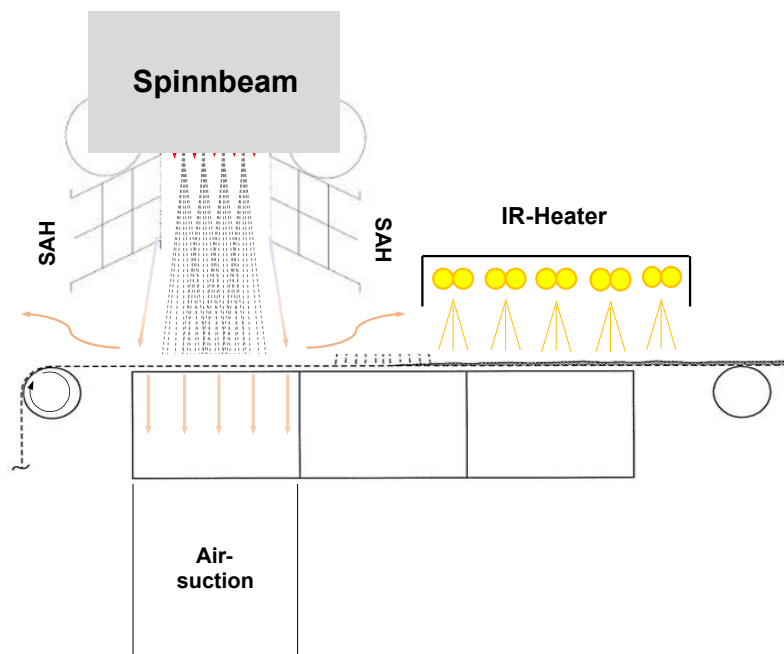

Fig.S1 IR heater in the Melt blow technology.

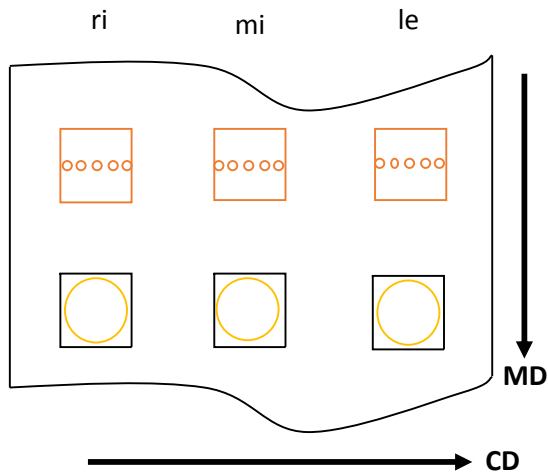

Fig.S2 Scheme of the sampling on the produced nonwovens for analysis of nonwoven properties and homogeneity (distribution); squares:  $10 \times 10$  cm for area base weight measurements; blue dots: sampling of area base weight in finer resolution ( $0.782 \text{ cm}^2$ ); green circles: air permeability ( $20 \text{ cm}^2$ ); yellow dots: thickness measurements ( $1 \text{ cm}^2$ ); abbreviations: machine direction (MD), cross direction (CD), left (le), middle (mi), and right (re).

### SEM Characterization

Meltblown PLA nonwoven textiles were seen at magnifications ranging from  $\times 100$  to  $\times 1000$ , revealing a consistent arrangement of PLA fibers over many layers (Fig.S3). The comprehensive visual representation of the meltblown PLA nonwoven fabric is depicted in Fig. S4. The aforementioned photos provide confirmation that the longitudinal bonding occurring at different fiber positions contributes to enhanced tensile characteristics, resulting in a smoother texture.

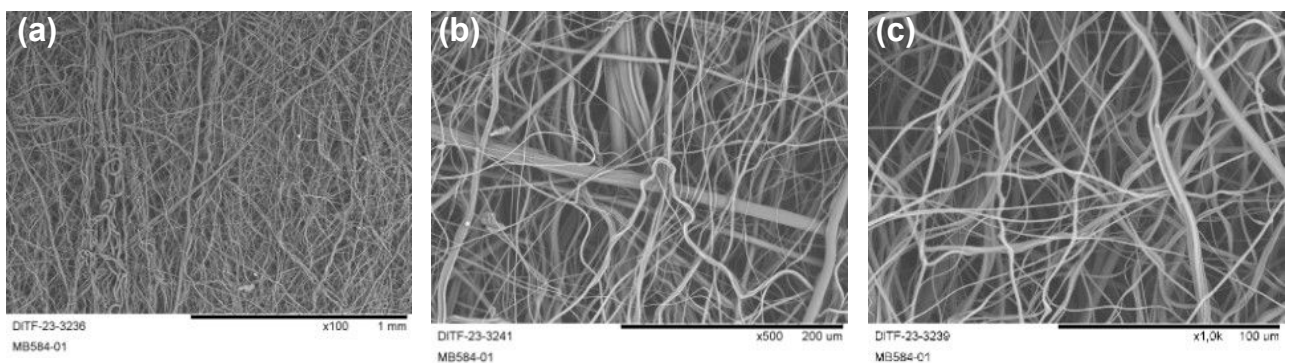

Fig.S3 SEM images of PLA meltblown nonwoven fabric with different resolution.

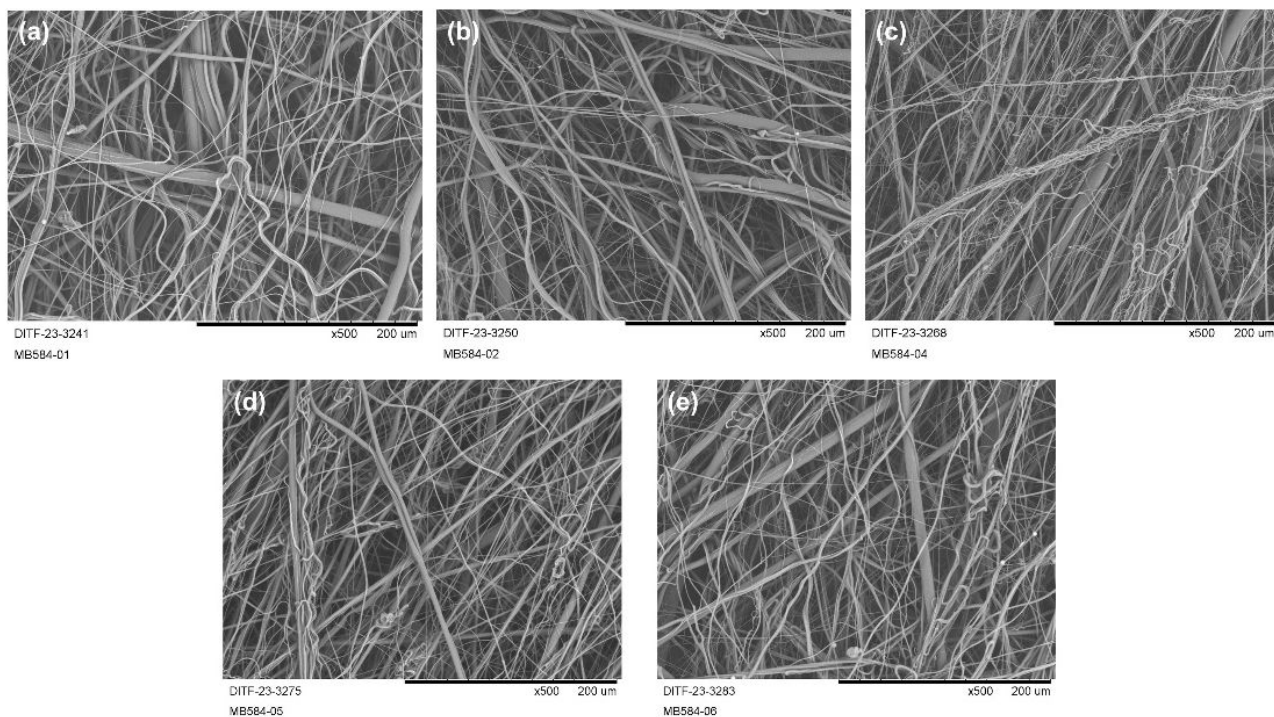

Fig. S4 SEM images of PLA meltblown nonwoven fabric (x500).

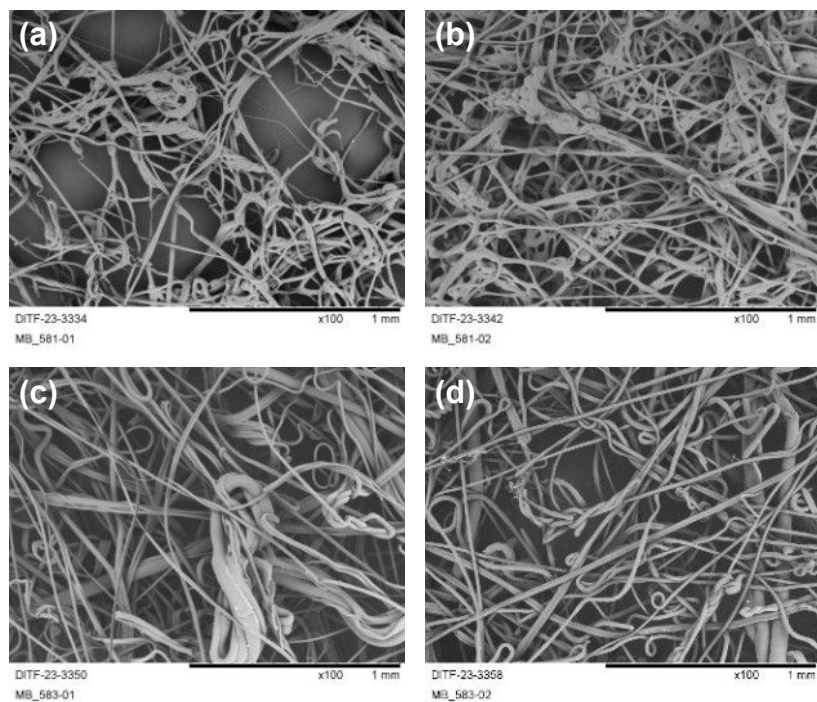

Fig. S5 SEM images of PBS (a and b); PE (c and d) meltblown nonwoven fabric.

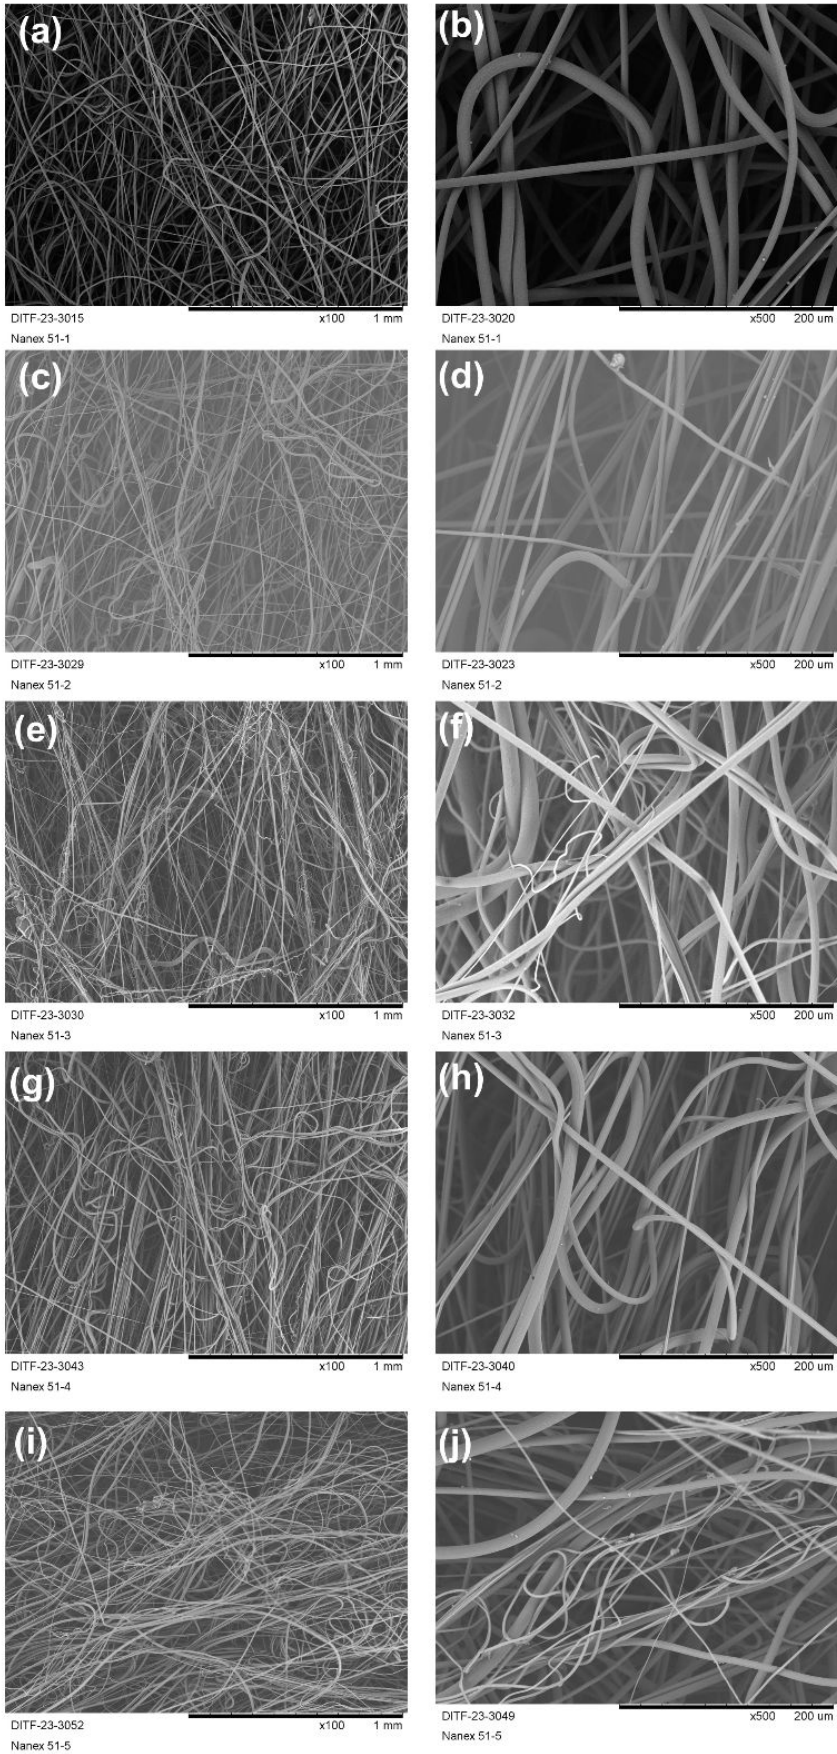

Fig. S6 SEM images of PLA NanEx nonwoven fabric.

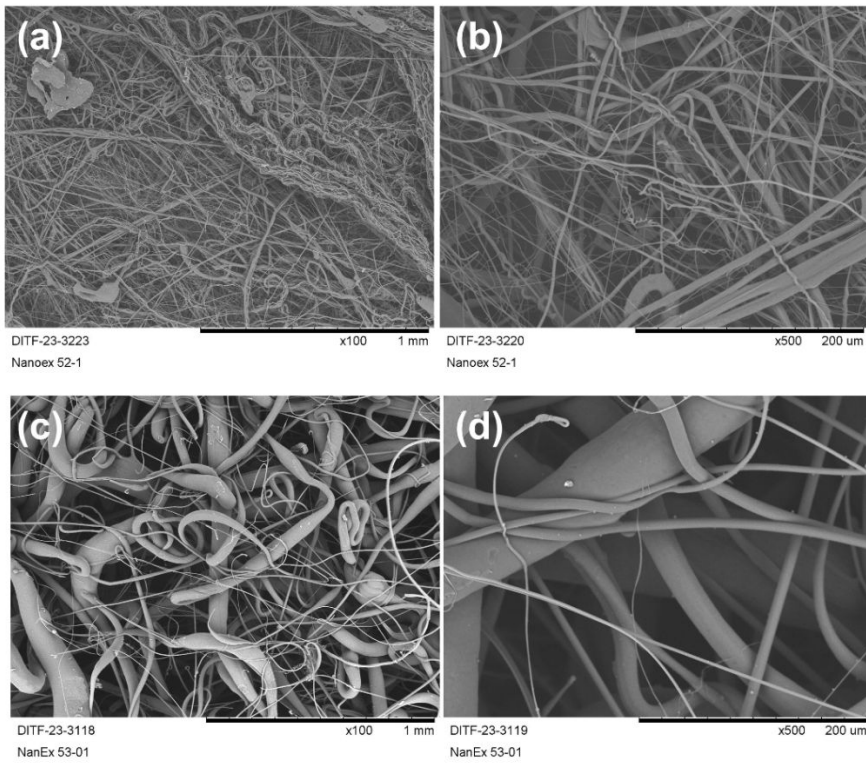

Fig. S7 SEM images of PBS (a and b); PE (c and d) NanEx nonwoven fabrics.

Table S1 Various physical properties of produced Nonwoven fabrics.

| Procedure | Material | Sample-Nr.  | Fiber diameter / $\mu\text{m}$ |             | Area Base Weight / gsm |        |       | Thickness / mm |        |       | Air permeability / (l/min)   |        |
|-----------|----------|-------------|--------------------------------|-------------|------------------------|--------|-------|----------------|--------|-------|------------------------------|--------|
|           |          |             | Median                         | Mean        | left                   | middle | right | left           | middle | right | (200 Pa, 20cm <sup>2</sup> ) | Stdev. |
|           |          |             | (SEM x1000)                    | (SEM x1000) | DIN EN ISO 29073 T1    |        |       | EN ISO 9037    |        |       | EN ISO 9237                  |        |
| Meltblown | PLA      | PLA-MB-01   | 5.6                            | 5.5         | 39                     | 43     | 38    | 0.16           | 0.22   | 0.15  | 1530                         | 55     |
| Meltblown | PLA      | PLA-MB-03   | 1.83                           | 2.59        | 37                     | 42     | 38    | 0.17           | 0.17   | 0.16  | 662                          | 21     |
| Meltblown | PLA      | PLA-MB-02   | 3.57                           | 3.83        | 41                     | 39     | 42    | 0.17           | 0.19   | 0.17  | 998                          | 18     |
| Meltblown | PLA      | PLA-MB-04   | 3.9                            | 4.11        | 22                     | 26     | 23    | 0.1            | 0.08   | 0.09  | 1610                         | 45     |
| Meltblown | PLA      | PLA-MB-05   | 5.52                           | 5.62        | 24                     | 25     | 23    | 0.07           | 0.09   | 0.08  | 2620                         | 156    |
| Meltblown | PLA      | PLA-MB-06   | 2.52                           | 3.09        | 21                     | 24     | 23    | 1              | 0.08   | 0.09  | 1020                         | 25     |
| Meltblown | PLA      | PLA-MB-07   | 2.15                           | 3.18        | 24                     | 26     | 21    | 0.08           | 0.1    | 0.1   | 1040                         | 21     |
| Meltblown | PBS      | PBS-MB-01   | 11.59                          | 12.68       | 25                     | 28     | 28    | 0.17           | 0.16   | 0.14  | 8380                         | 170    |
| Meltblown | BioHDPE  | PE-MB-011   | 12.9                           | 13.3        | 33                     | 38     | 35    | 0.19           | 0.25   | 0.2   | 6570                         | 714    |
| Meltblown | BioHDPE  | PE-MB-02    | 15.4                           | 14.4        | 32                     | 38     | 28    | 0.13           | 0.2    | 0.21  | 8100                         | 320    |
| Nanoval   | PLA      | PLA-NV_0113 | 8.15                           | 8.05        | 35                     | 40     | 30    | 0.205          | 0.22   | 0.145 | 4400                         | 900    |
| Nanoval   | PLA      | PLA-NV-02   | 4.25                           | 5.6         | 28                     | 38     | 35    | 0.115          | 0.185  | 0.165 | 3000                         | 300    |
| Nanoval   | PLA      | PLA-NV-03   | 2.59                           | 3.84        | 30                     | 42     | 37    | 0.155          | 0.21   | 0.14  | 3300                         | 1500   |
| Nanoval   | PLA      | PLA-NV-04   | 3.72                           | 4.27        | 33                     | 39     | 37    | 0.165          | 0.185  | 0.17  | 2800                         | 300    |
| Nanoval   | PLA      | PLA-NV-05   | 4.55                           | 4.91        | 18                     | 23     | 19    | 0.11           | 0.125  | 0.085 | 5500                         | 400    |
| Nanoval   | PLA      | PLA-NV-06   | 2.43                           | 3.05        | 17                     | 21     | 19    | 0.07           | 0.11   | 0.08  | 2750                         | 335    |
| Nanoval   | PBS      | PBS-NV-01   | 2.11                           | 2.67        | 21                     | 24     | 19    | 0.14           | 0.185  | 0.11  | 2300                         | 300    |
| Meltblown | PLA      | PLA-MB-08   | 1.37                           | 1.6         | 40                     | 40     | 40    | 0.14           | 0.145  | 0.165 | 580                          | 30     |
| Meltblown | PLA      | PLA-MB-09   | 1.49                           | 1.77        | 26                     | 26     | 26    | 0.085          | 0.095  | 0.14  | 900                          | 100    |
| Meltblown | PLA      | PLA-MB-11   | 1.44                           | 1.8         | 26                     | 24     | 24    | 0.11           | 0.105  | 0.11  | 800                          | 0      |
| Meltblown | PLA      | PAMB-10     | 1.56                           | 1.9         | 38                     | 40     | 39    | 0.145          | 0.15   | 0.14  | 540                          | 20     |

\*\*\*\*\*END\*\*\*\*\*
